# Supplementary material for: Plasma Based Markers of [11C] PiB-PET Brain Amyloid Burden
Source: PLOS journal article supplement (doi:10.1371/journal.pone.0044260), 2012-09-24
Supplement: S2 (10.1371/journal.pone.0044260.s002) [file journal.pone.0044260.s002]

**Table S1. Characteristics of the ADNI-PiB PET cohort by diagnostic group.**

| Characteristics                                         | Diagnostic group (number of subjects) |             |              |         |
|---------------------------------------------------------|---------------------------------------|-------------|--------------|---------|
|                                                         | Controls (19)                         | MCI (49)    | AD (16)      | P-value |
| Age in years at time of plasma sample<br>(Median [IQR]) | 78.9 [10.1]                           | 75.2 [10.4] | 72.7 [7.8]   | 0.222   |
| Sex (Male/Female)                                       | 11/8                                  | 33/16       | 10/6         | 0.782   |
| Years of education<br>(Median [IQR])                    | 14.0 [5.5]                            | 16.0 [4.0]  | 16.0 [3.8]   | 0.221   |
| Number of <i>APOE</i> $\epsilon$ 4 alleles (0/1/2)      | 13/6/0                                | 26/19/4     | 6/8/2        | 0.3388  |
| Average PiB uptake<br>(Median [IQR])                    | 1.36 [0.69]                           | 1.98 [0.74] | 1.87 [0.408] | 0.022   |

P-values were calculated when appropriate for differences across diagnostic groups, using a Kruskal-Wallis  $\chi^2$  test for continuous characteristics and simulated contingency table p-values for discrete characteristics.
